# Supplementary material
Source: Springer Nature journal article supplement (https://www.springermedizin.de/resource/supplementary/13054_2012_941_MOESM9_ESM.pdf/9709290)

### AJRCCM cohort clustering

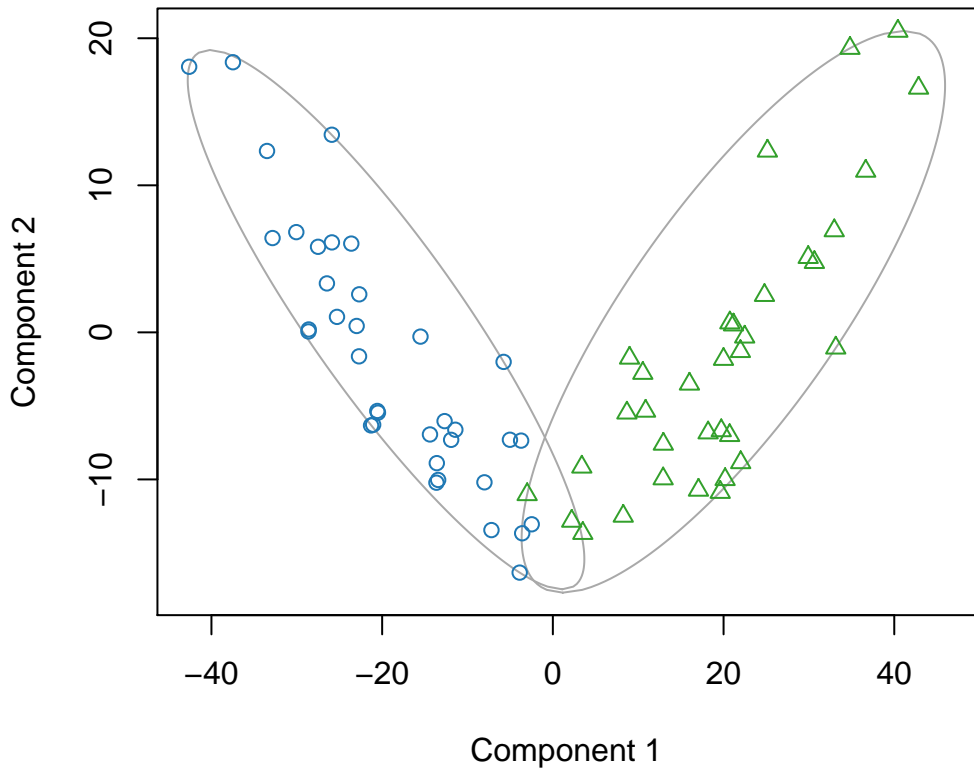

### AJRCCM cohort Silhouette plot

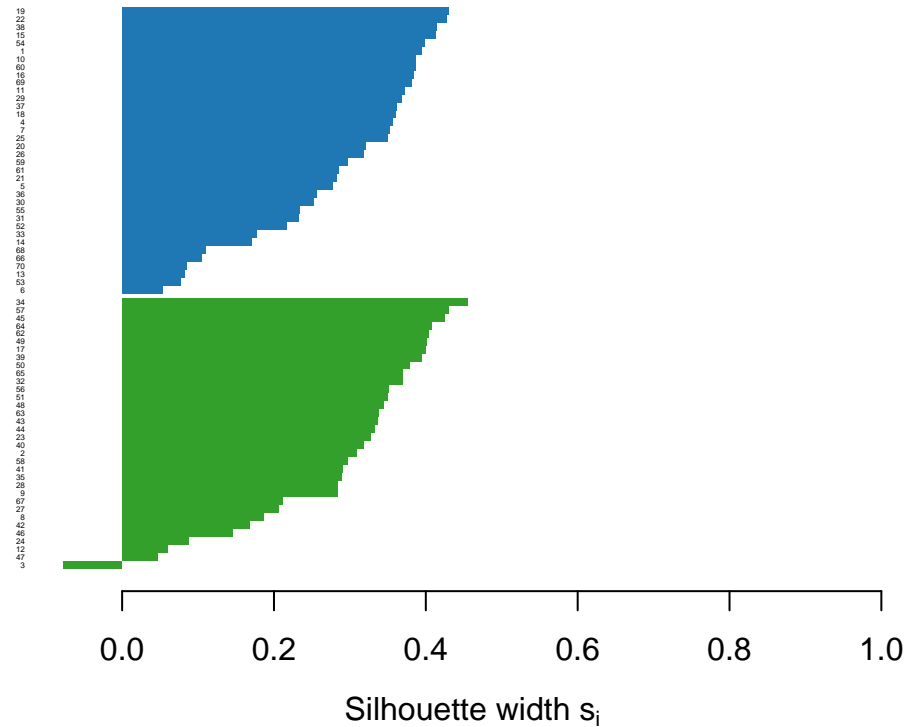

Supplement: MOESM9 [file 9709290]
